# Supplementary material
Source: PubMed Central journal article supplement (PMC7313256)
Supplement: holton_et_al_suppl_table_s1_ioaa036.pdf [file holton_et_al_suppl_table_s1_ioaa036.pdf]

### Mice lacking ovarian follicles

|                               | <u>Wild type</u> | <u><i>Chtf18</i><sup>-/-</sup></u> |
|-------------------------------|------------------|------------------------------------|
| <b><u>3 months of age</u></b> |                  |                                    |
| Primary follicles             | 0 (14)           | 0 (14)                             |
| Secondary follicles           | 0 (14)           | 0 (14)                             |
| Antral follicles              | <b>1 (14)</b>    | <b>4 (14)</b>                      |
|                               | <b>2.4%</b>      | <b>9.5%</b>                        |
| <b><u>6 months of age</u></b> |                  |                                    |
| Primary follicles             | 0 (10)           | <b>2 (10)</b>                      |
| Secondary follicles           | 0 (10)           | <b>1 (10)</b>                      |
| Antral follicles              | 0 (10)           | <b>4 (10)</b>                      |
|                               |                  | <b>23.3%</b>                       |

Percentages of mice lacking ovarian follicles and non-zero values are in bold  
(Total numbers of mice for each follicle type)
