# Supplementary material
Source: PubMed Central journal article supplement (PMC7313256)

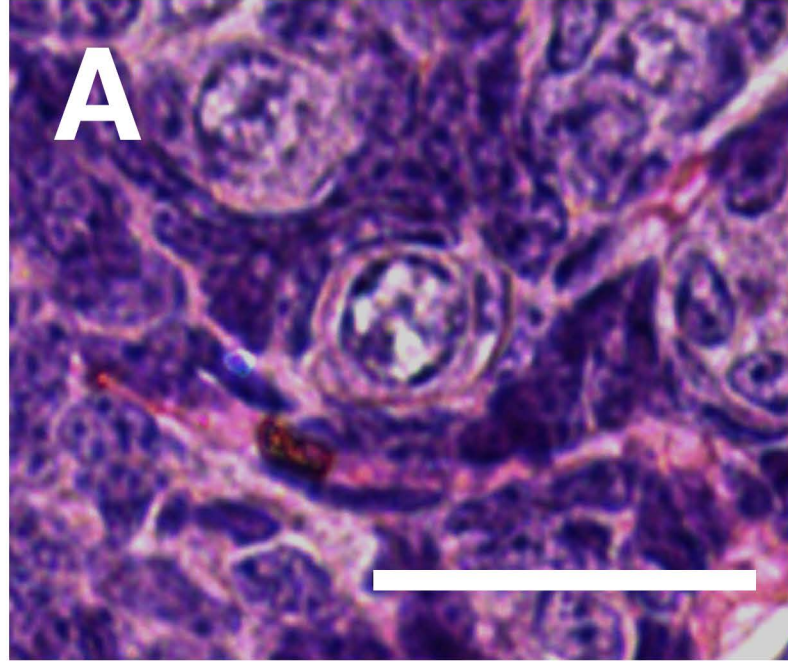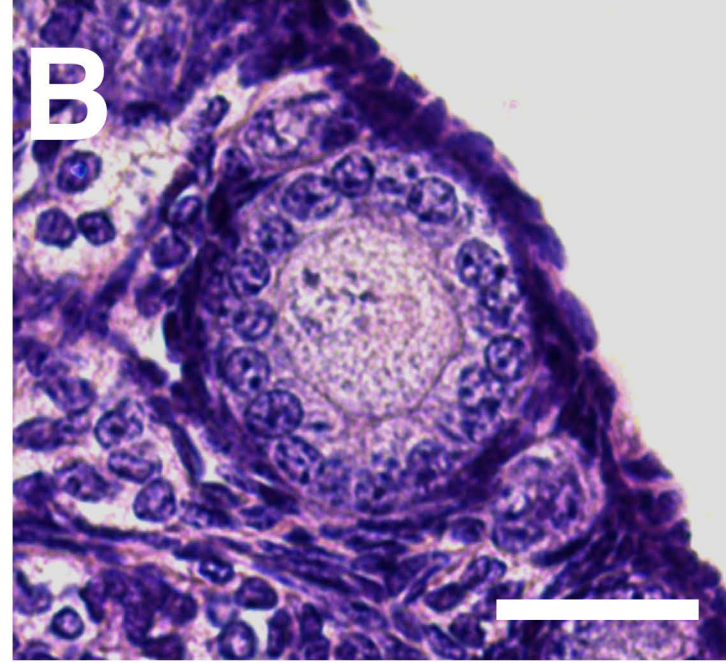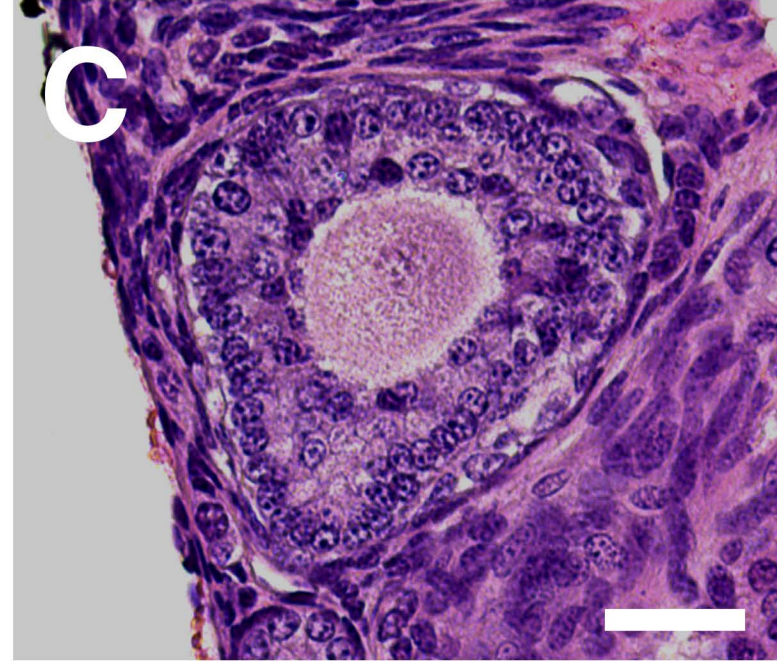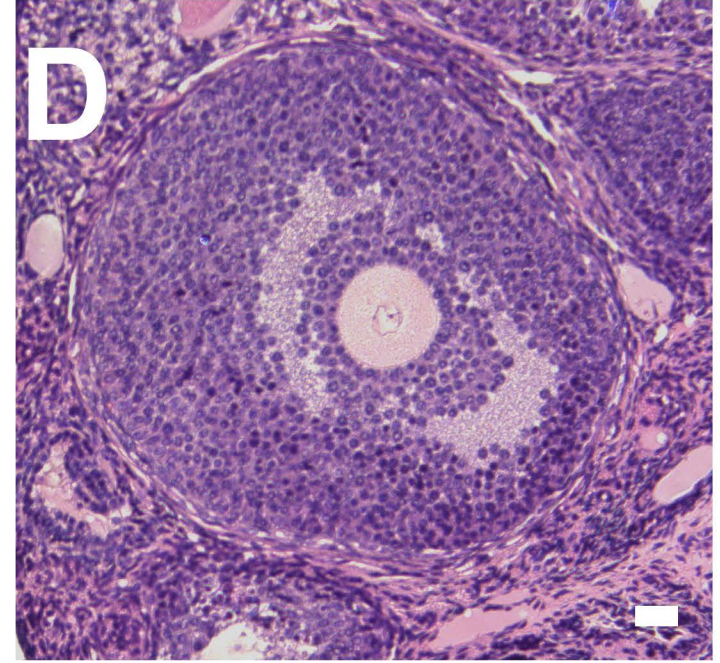

Supplement: holton_et_al_suppl_fig_s1_ioaa036.pdf [file holton_et_al_suppl_fig_s1_ioaa036.pdf]
